# Supplementary material for: Annual Total Medical Expenditures Associated with Hypertension by Diabetes Status in U.S. Adults
Source: PubMed Central journal article supplement — Am J Prev Med. Author manuscript; Available in PMC 2018 Feb 20. (PMC5819741; doi:10.1016/j.amepre.2017.07.018), 2017-12
Supplement: NIHMS939652-supplement-1.pdf [file NIHMS939652-supplement-1.pdf]

**Appendix**  
**Annual Total Medical Expenditures Associated with Hypertension by Diabetes Status in U.S. Adults**  
**Wang et al.**

**Appendix Table 1.** Sample Characteristics of U.S. Adults, 2013–2014 Medical Expenditure Panel Survey (N=40,746)

| <b>Variables</b>           | <b>Weighted %</b> | <b>SE</b> |
|----------------------------|-------------------|-----------|
| Total                      | 100               |           |
| Age, years                 |                   |           |
| 18–44                      | 44.49             | 0.53      |
| 45–64                      | 35.76             | 0.48      |
| ≥65                        | 19.76             | 0.46      |
| Sex                        |                   |           |
| Male                       | 49.33             | 0.30      |
| Female                     | 50.67             | 0.30      |
| Race/Ethnicity             |                   |           |
| Non-Hispanic white         | 66.26             | 1.02      |
| Non-Hispanic black         | 11.39             | 0.63      |
| Hispanic                   | 14.40             | 0.81      |
| Other race                 | 7.95              | 0.58      |
| Married                    |                   |           |
| Yes                        | 52.10             | 0.63      |
| No                         | 47.90             | 0.63      |
| Education                  |                   |           |
| Less than high school      | 13.35             | 0.39      |
| High school graduate       | 26.35             | 0.49      |
| More than high school      | 60.31             | 0.60      |
| Geographic region          |                   |           |
| Northeast                  | 17.81             | 0.63      |
| Midwest                    | 21.75             | 0.73      |
| South                      | 37.24             | 0.94      |
| West                       | 23.20             | 0.69      |
| Family income <sup>a</sup> |                   |           |
| Low                        | 30.02             | 0.60      |
| Middle                     | 29.30             | 0.46      |
| High                       | 40.69             | 0.72      |
| Any health insurance       |                   |           |
| Yes                        | 86.84             | 0.45      |
| No                         | 13.16             | 0.45      |
| Current smoker             |                   |           |
| Yes                        | 16.14             | 0.41      |
| No                         | 83.86             | 0.41      |
| Body weight <sup>b</sup>   |                   |           |
| Normal                     | 34.80             | 0.50      |
| Overweight                 | 34.19             | 0.37      |
| Obese                      | 31.01             | 0.48      |
| Self-rated health status   |                   |           |
| Excellent                  | 25.10             | 0.43      |
| Very good                  | 34.46             | 0.40      |
| Good                       | 27.25             | 0.41      |
| Fair or poor               | 13.19             | 0.33      |

<sup>a</sup>For family income variable: Low=family income <200% of poverty line; middle=family income 200–400% of poverty line; high=family income >400% of poverty line.

<sup>b</sup>For body weight variable: Normal=BMI (defined as weight in kilograms divided by height in meters squared) <25; overweight=BMI 25–30; obese=BMI >30.
